# Supplementary material for: Copper germanate nanowire/reduced graphene oxide anode materials for high energy lithium-ion batteries
Source: Royal Society of Chemistry journal article supplement (doi:10.1039/c3ta12344h), 2013-01-01
Supplement: c3ta12344h.pdf [file c3ta12344h.pdf]

# Copper Germanate Nanowires/Reduced Graphene Oxide Anode Materials for High Energy Lithium-Ion Batteries

Zhe Chen <sup>a,b</sup>, Yang Yan <sup>a,b</sup>, Sen Xin <sup>a,b</sup>, Wei Li <sup>a,b</sup>, Jin Qu <sup>a,b</sup>, Yu-Guo Guo <sup>\*a</sup> and Wei-Guo Song <sup>\*a</sup>

<sup>a</sup>Beijing National Laboratory for Molecular Sciences (BNLMS) & Key Laboratory for Molecular Nanostructures and Nanotechnology, Institute of Chemistry, Chinese Academy of Sciences, Beijing, 100190, P. R. China. Tel & Fax:

+86-10-62557908; E-mail: [wsong@iccas.ac.cn](mailto:wsong@iccas.ac.cn);

E-mail: [yguo@iccas.ac.cn](mailto:yguo@iccas.ac.cn);

<sup>b</sup>University of Chinese Academy of Sciences, Beijing, 100049, P. R. China.

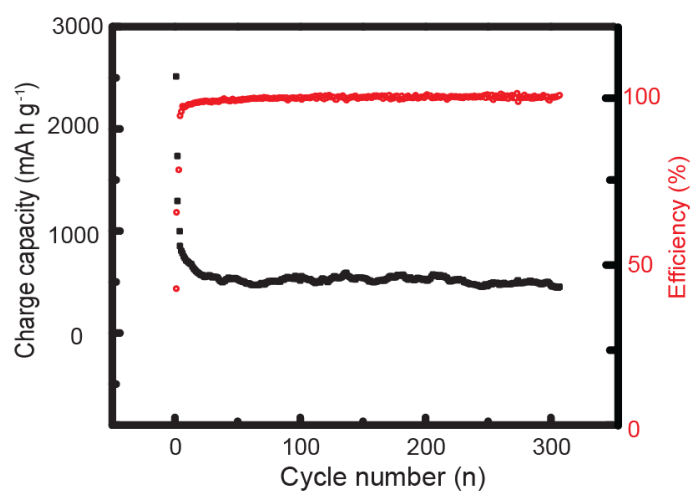

Figure S1 Cycling performance of the CuGeO<sub>3</sub>@RGO anode at 2A g<sup>-1</sup>

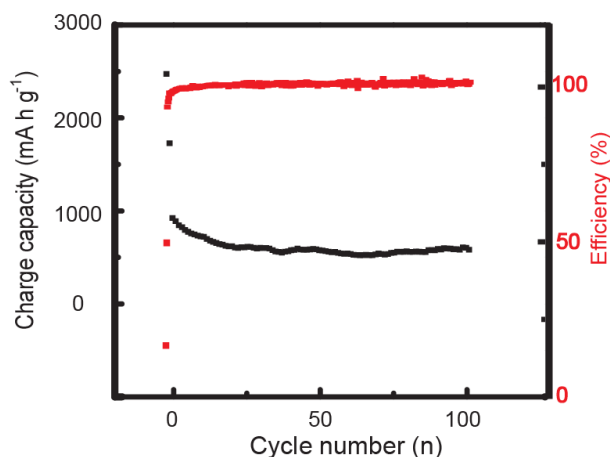

Figure S2 Cycling performance of the CuGeO<sub>3</sub> anode at 100mA g<sup>-1</sup>

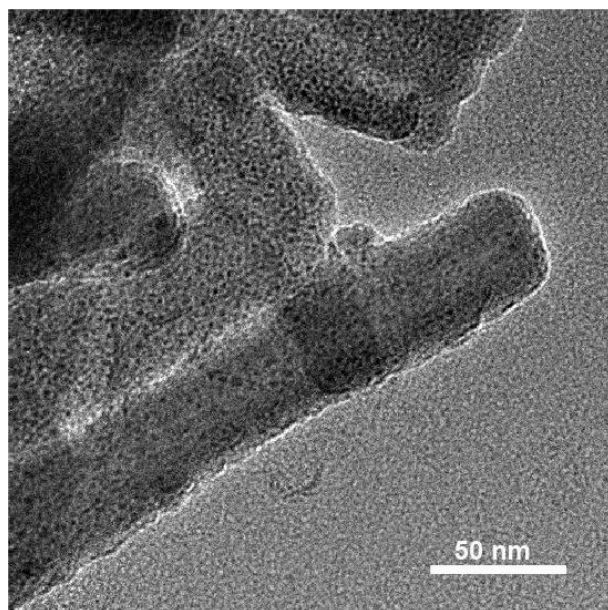

Figure S3 TEM of the  $\text{CuGeO}_3$ @RGO nanowires after 300 cycles.
